# Supplementary material for: Histone H3 Variant Regulates RNA Polymerase II Transcription Termination and Dual Strand Transcription of siRNA Loci in Trypanosoma brucei
Source: PubMed Central journal article supplement (PMC4721609; doi:10.1371/journal.pgen.1005758), 2016-01-21

# Chr. 1

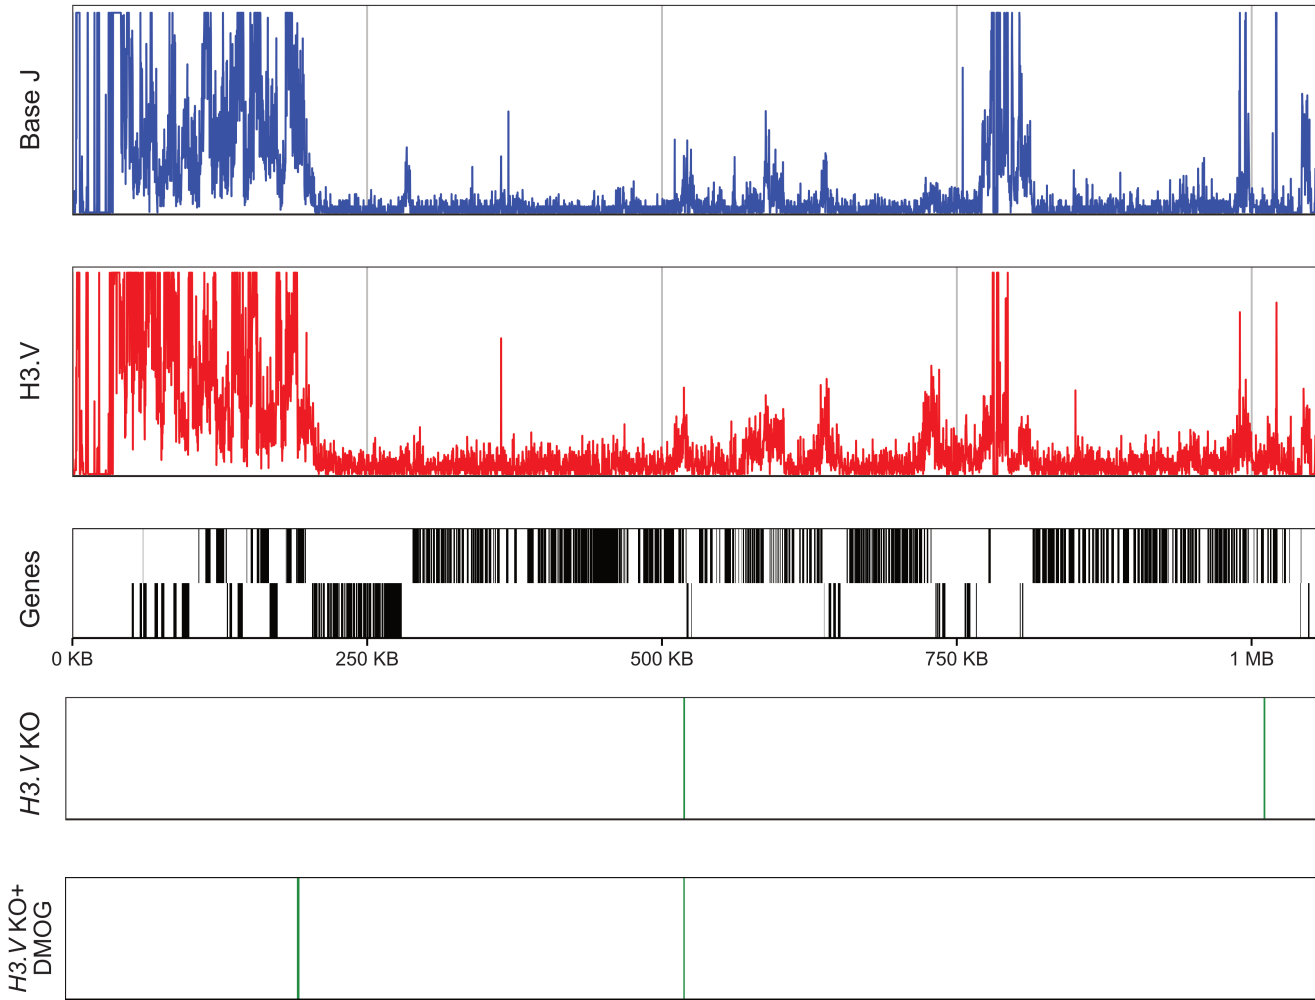

# Chr. 2

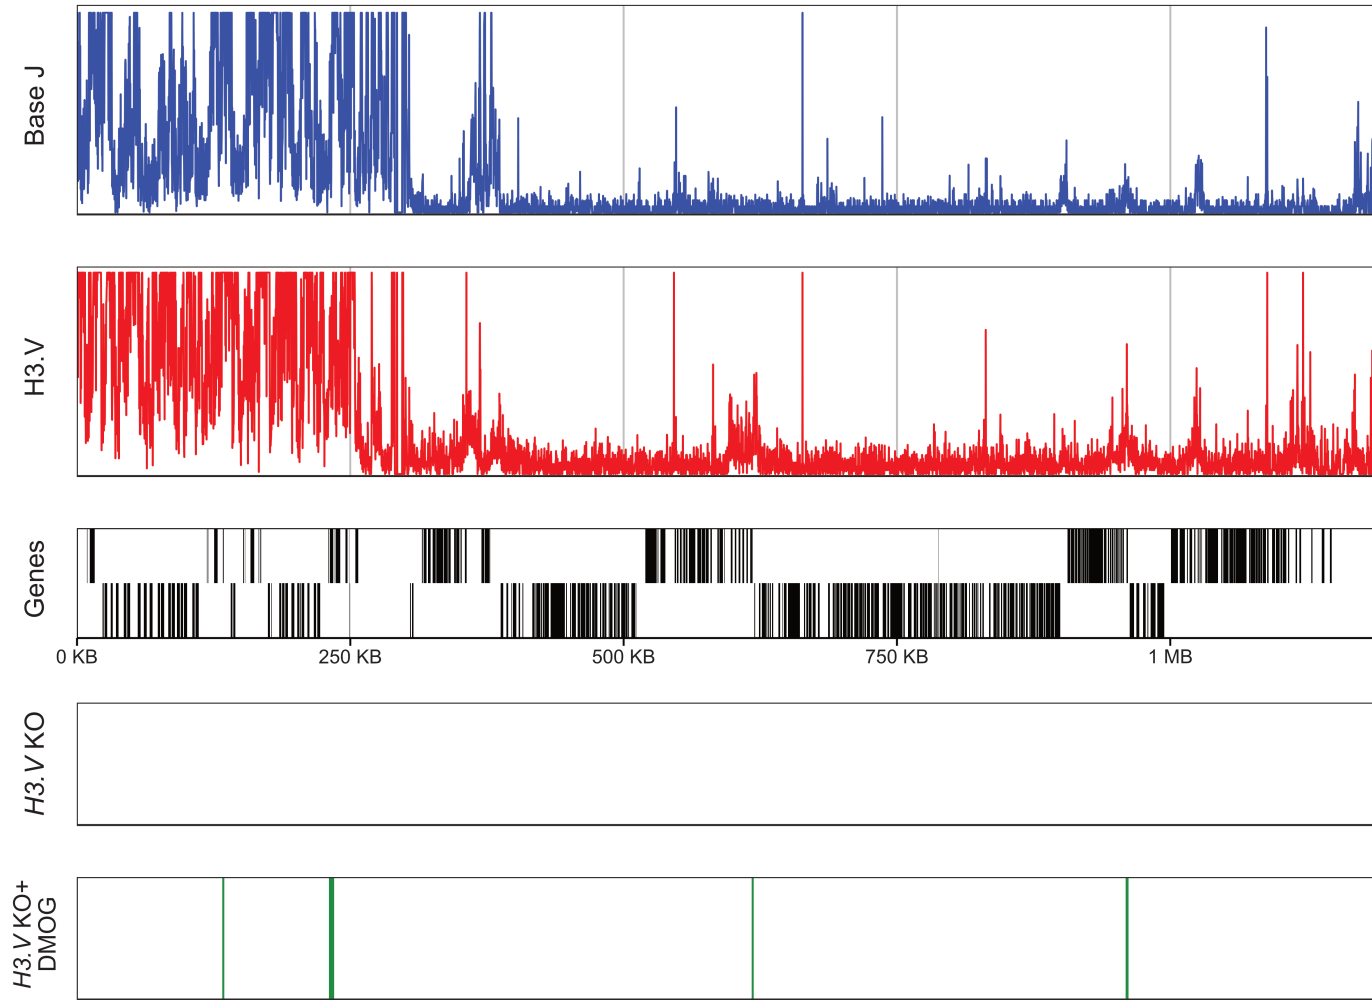

# Chr. 3

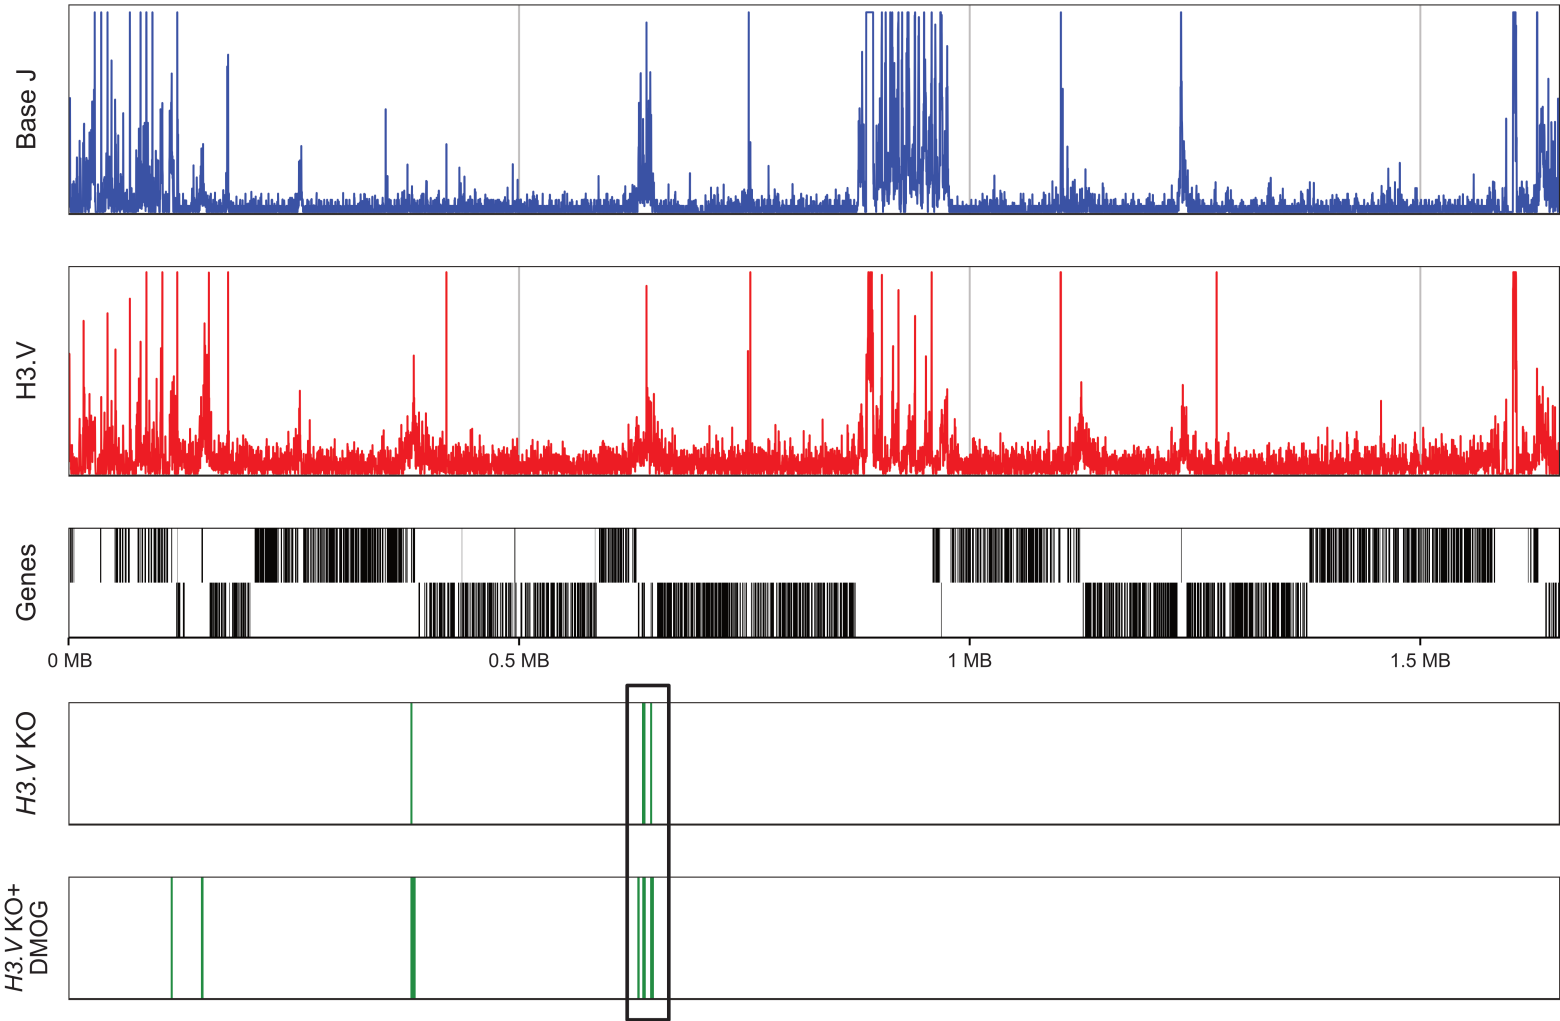

# Chr. 4

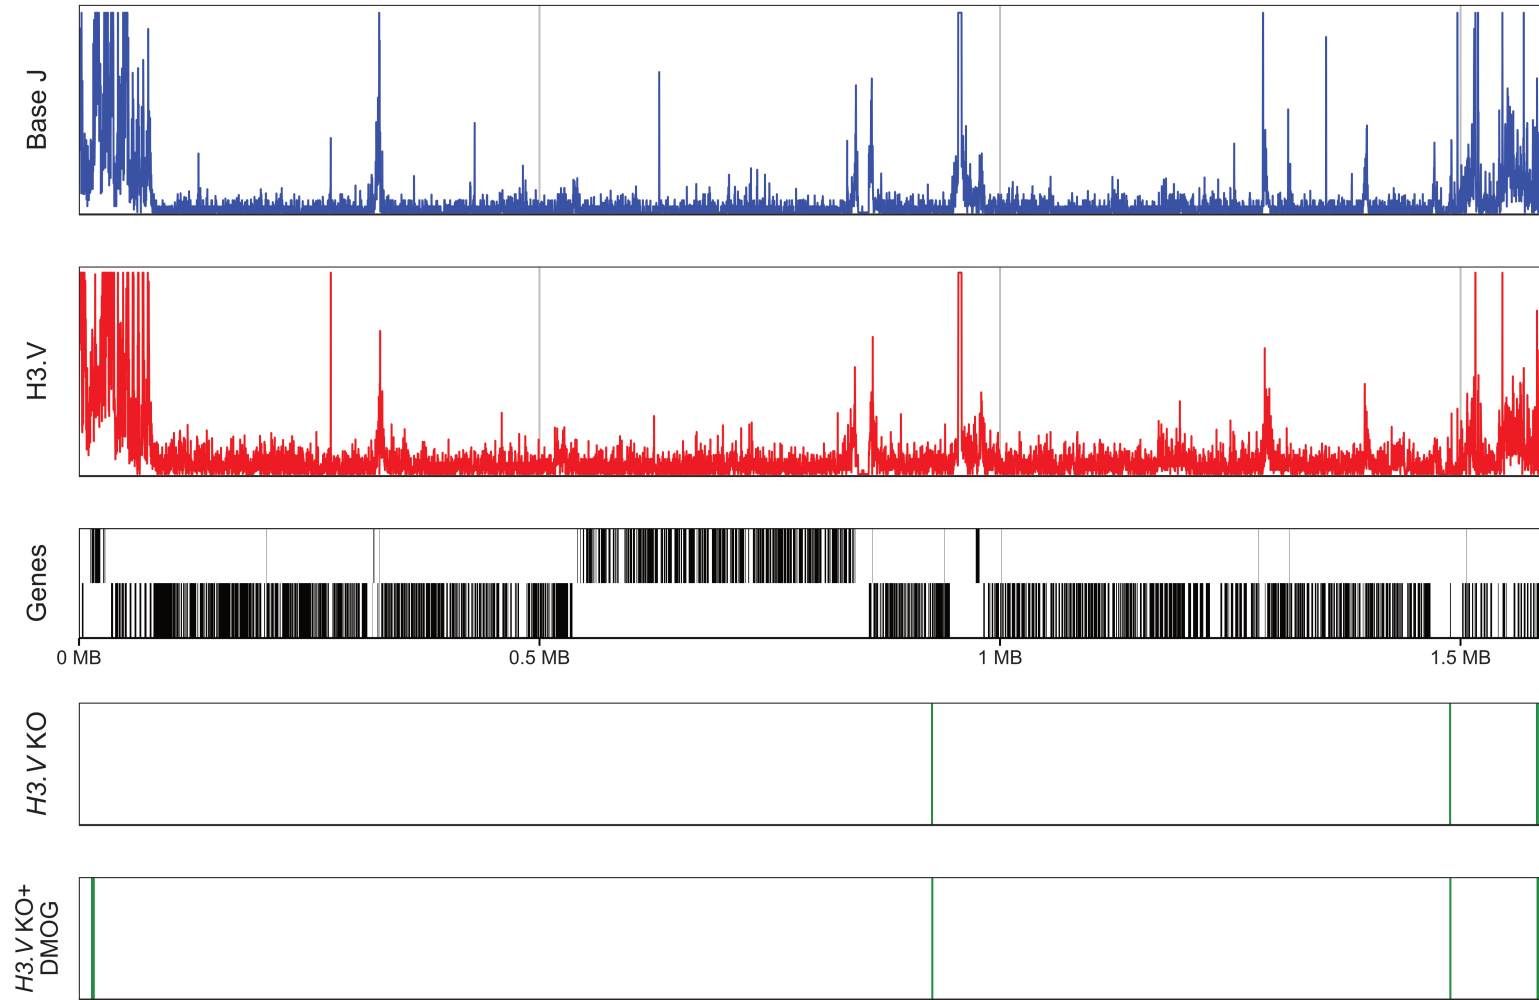

# Chr. 5

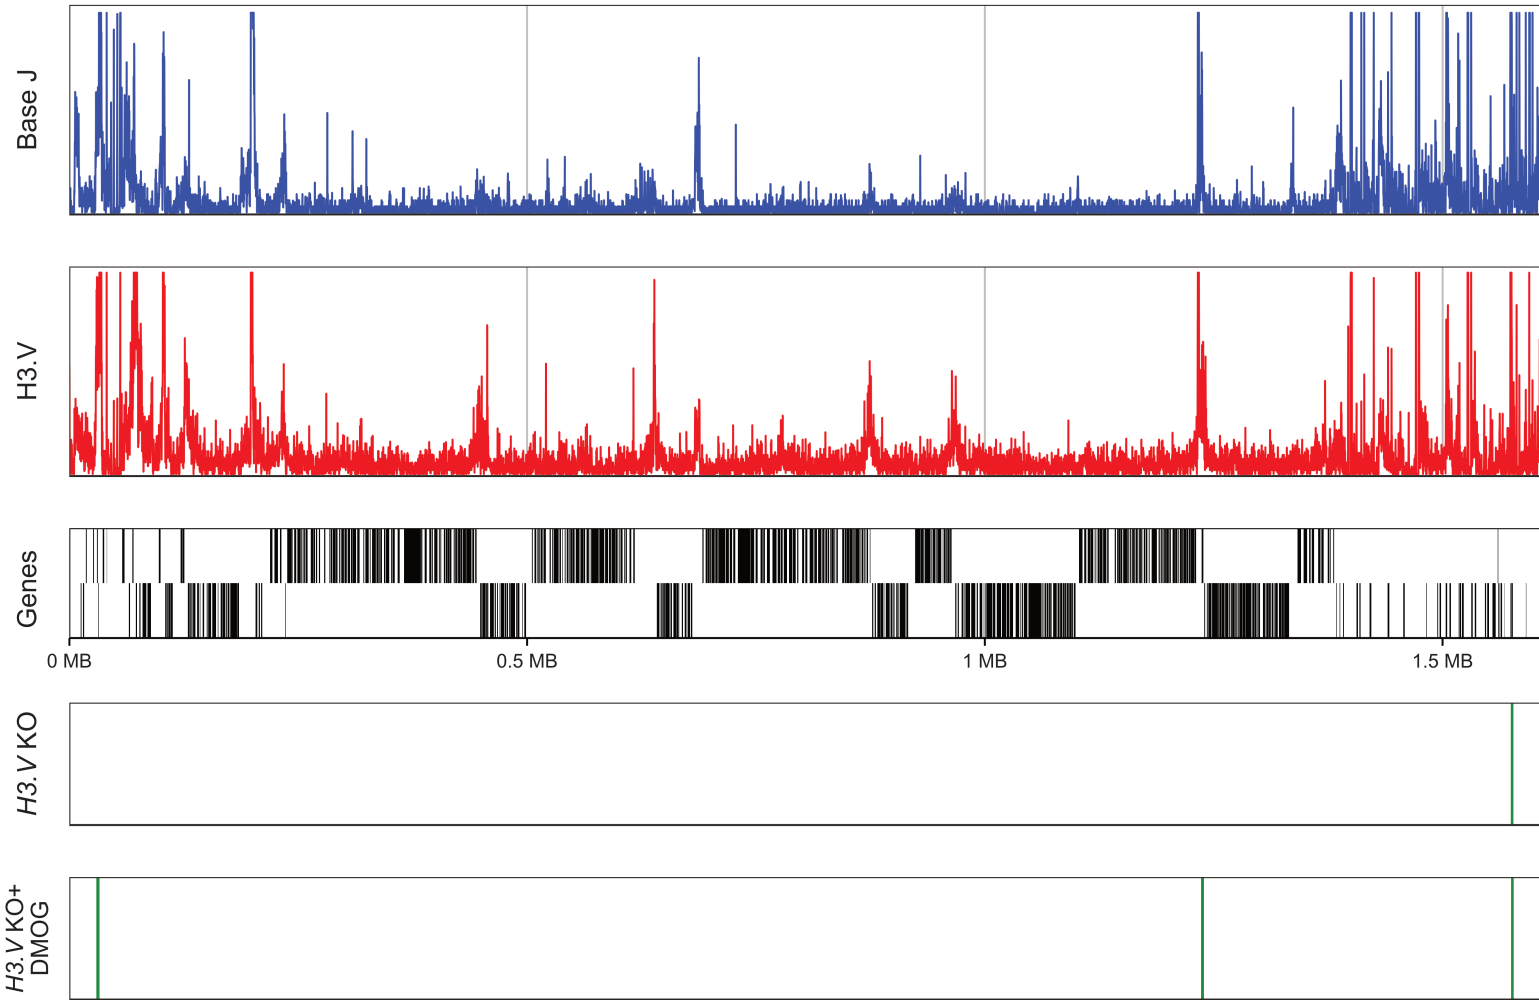

# Chr. 6

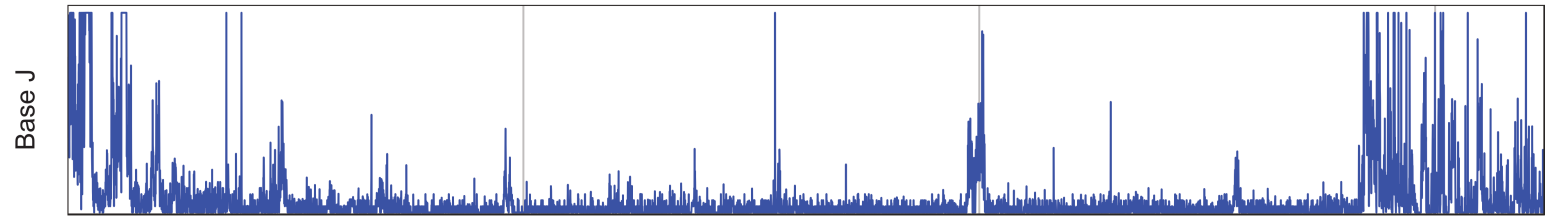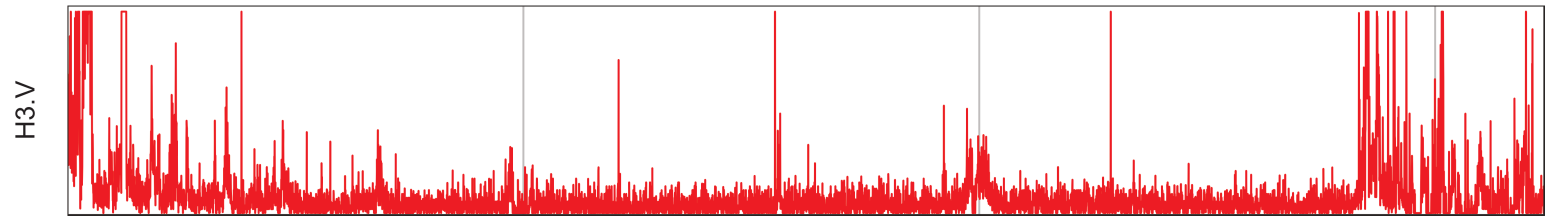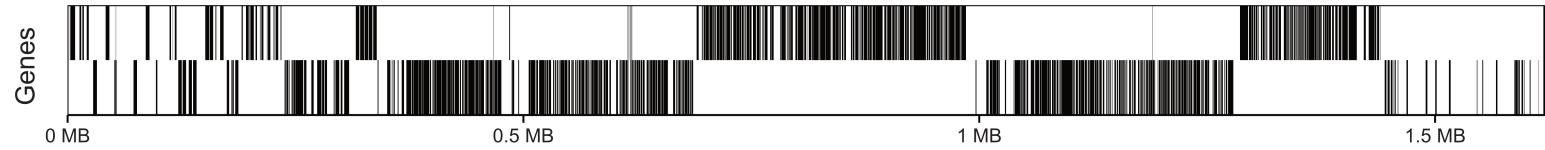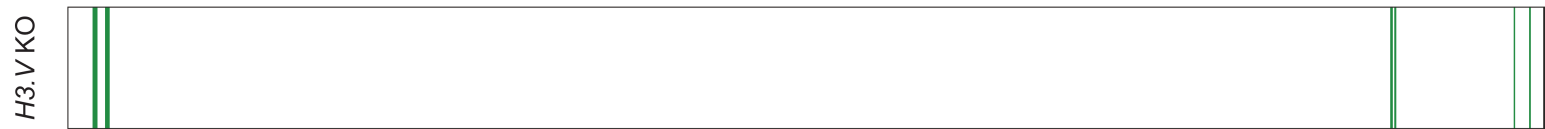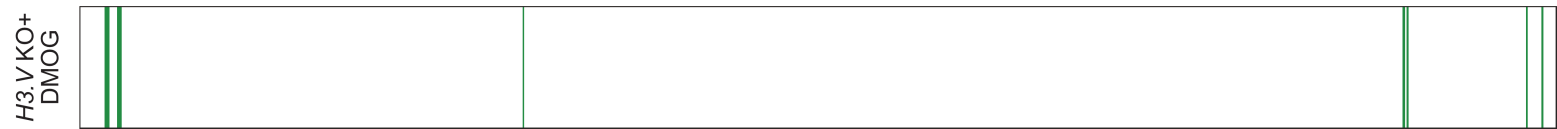

# Chr. 7

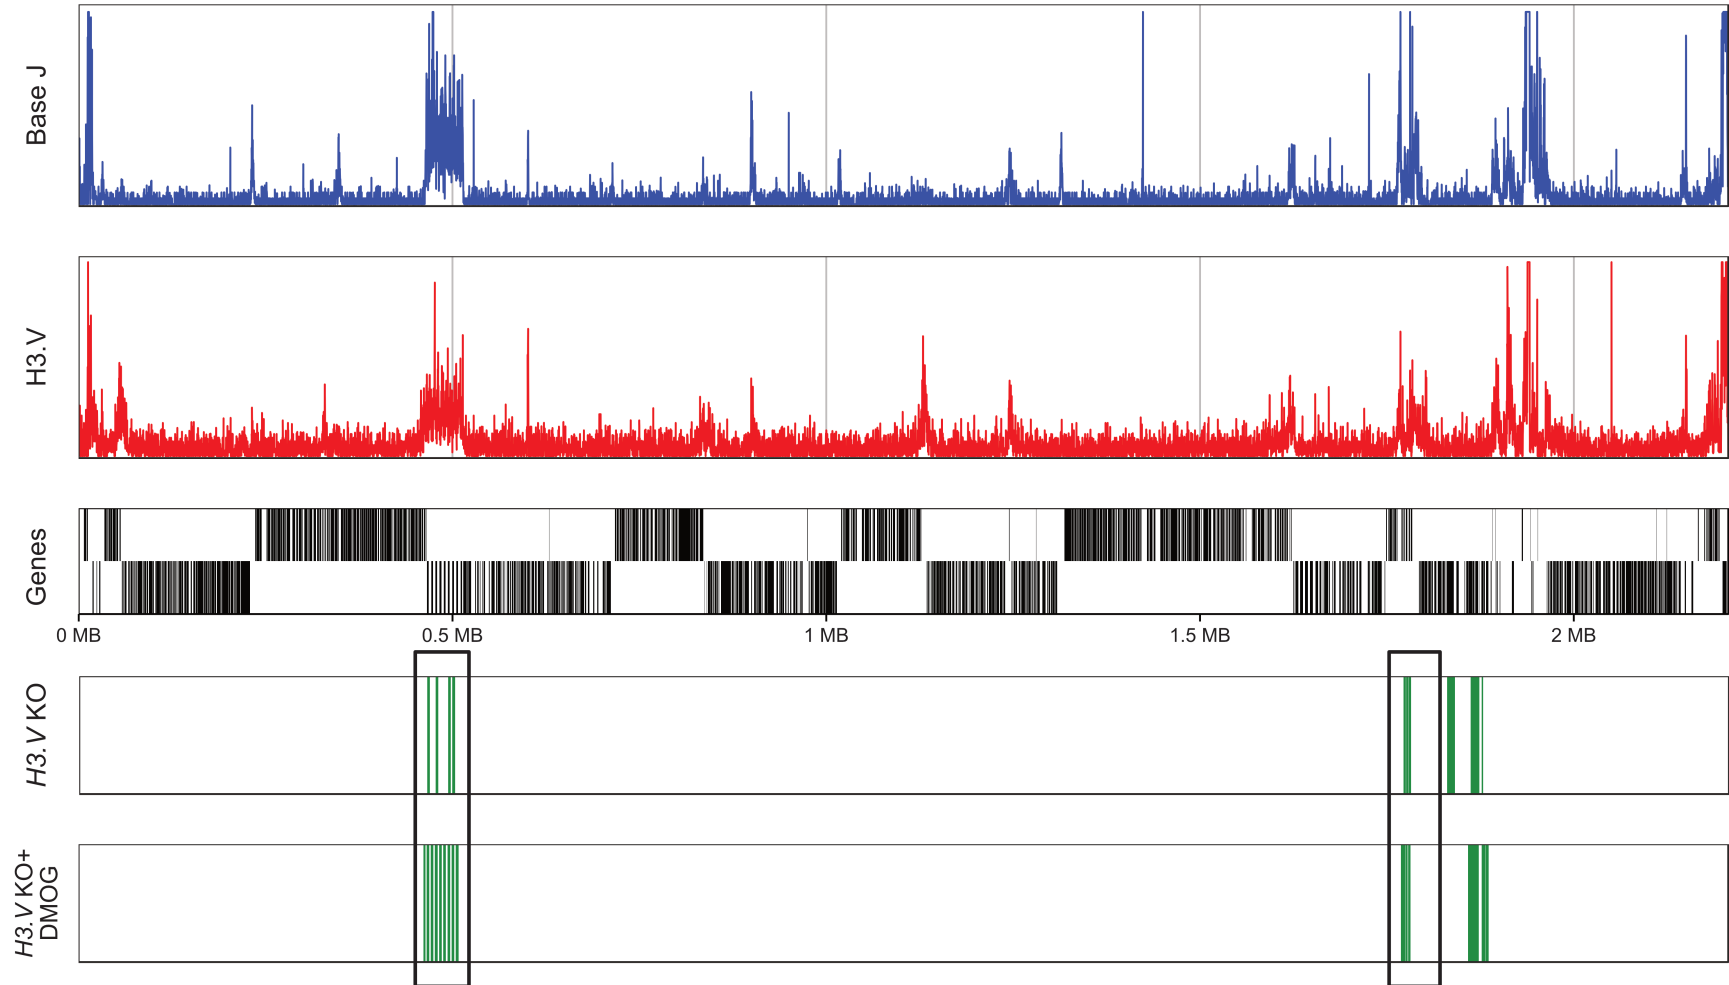

# Chr. 8

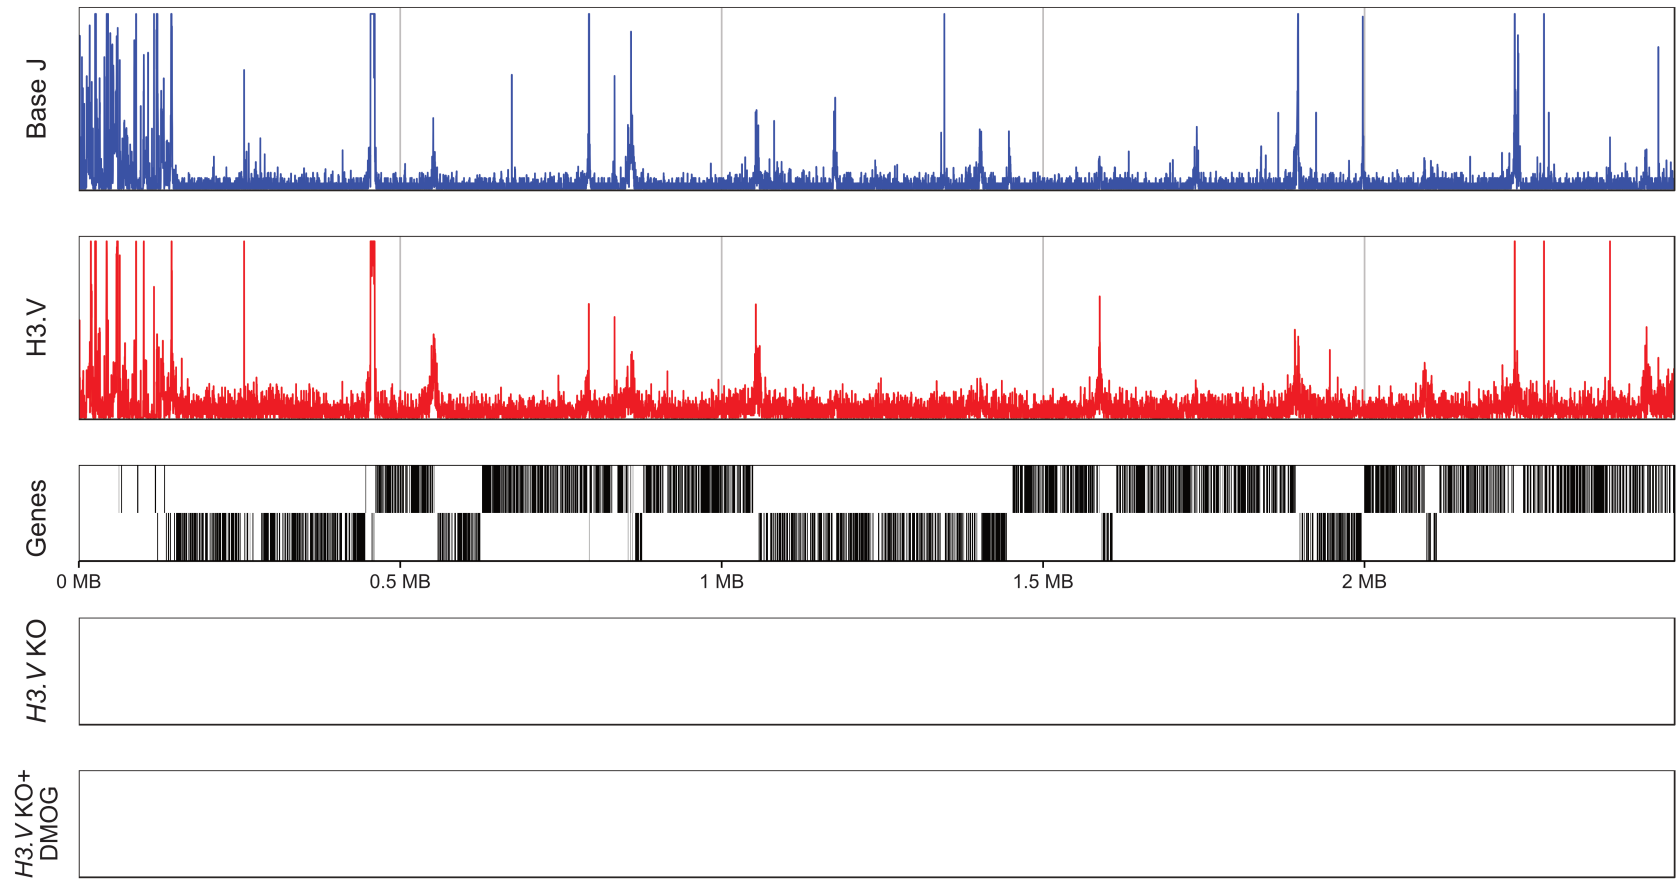



# Chr. 9

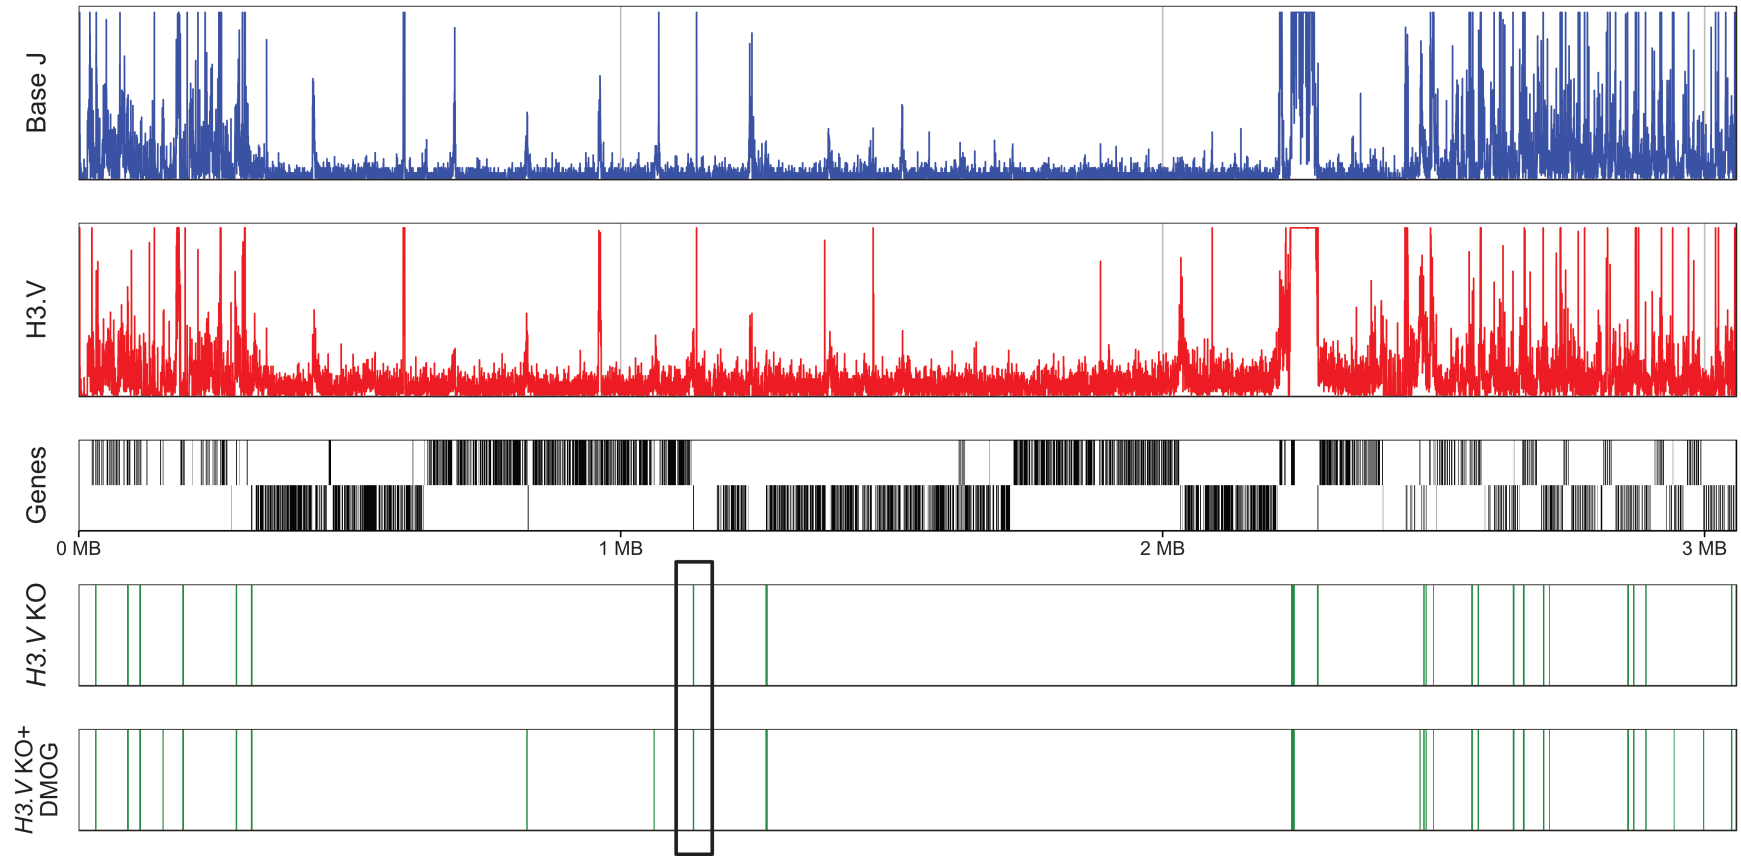

# Chr. 10

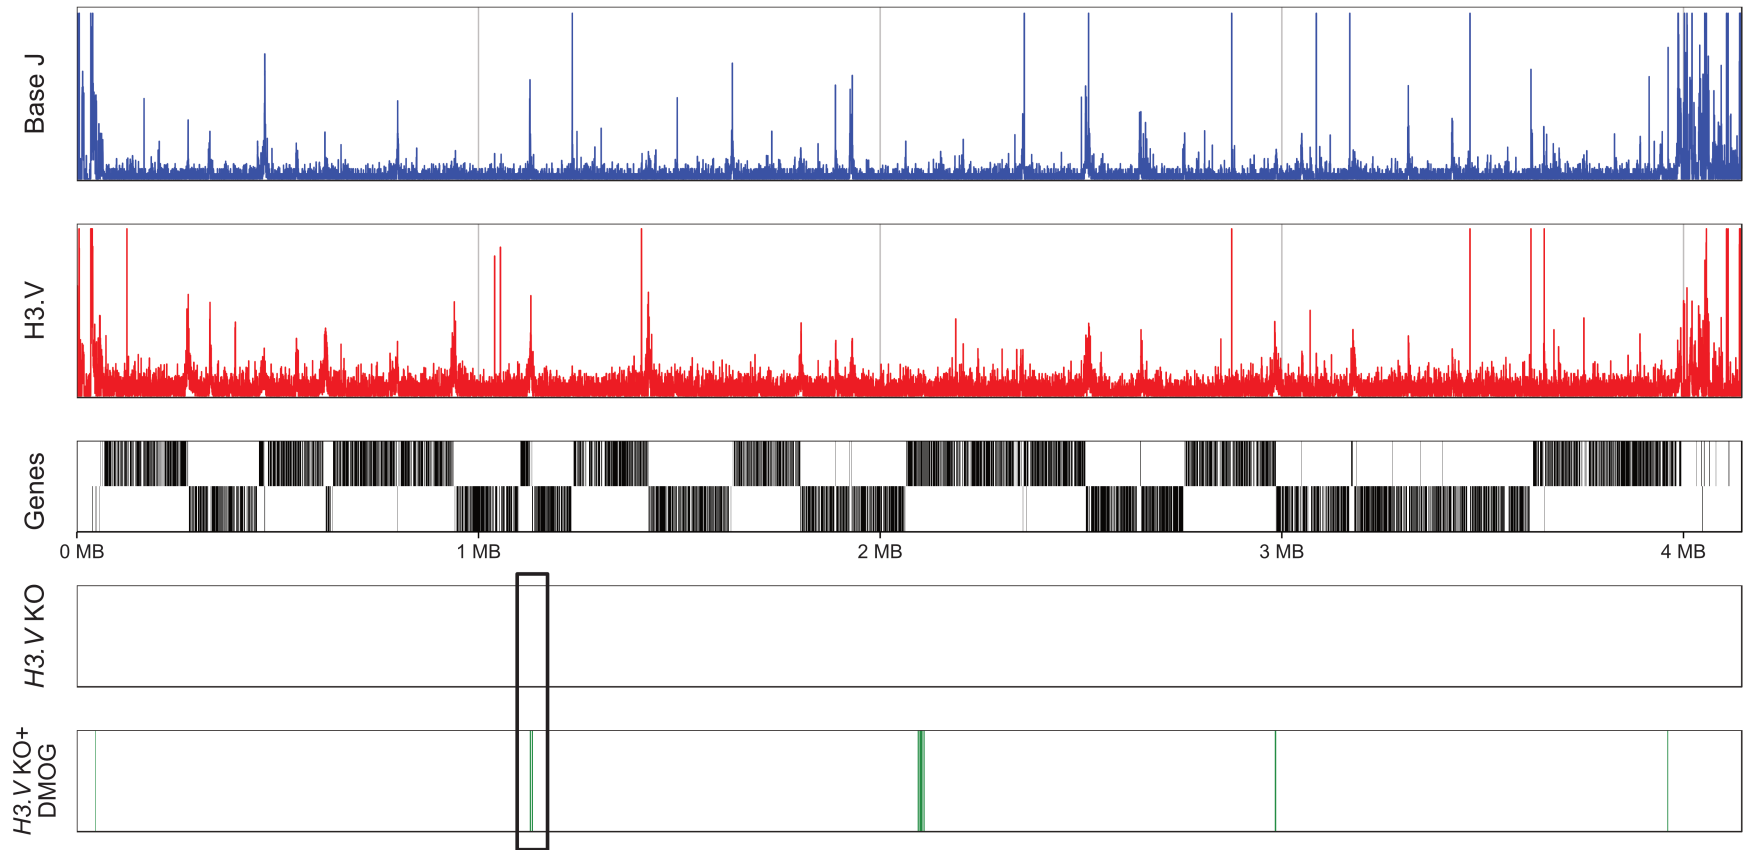

# Chr. 11

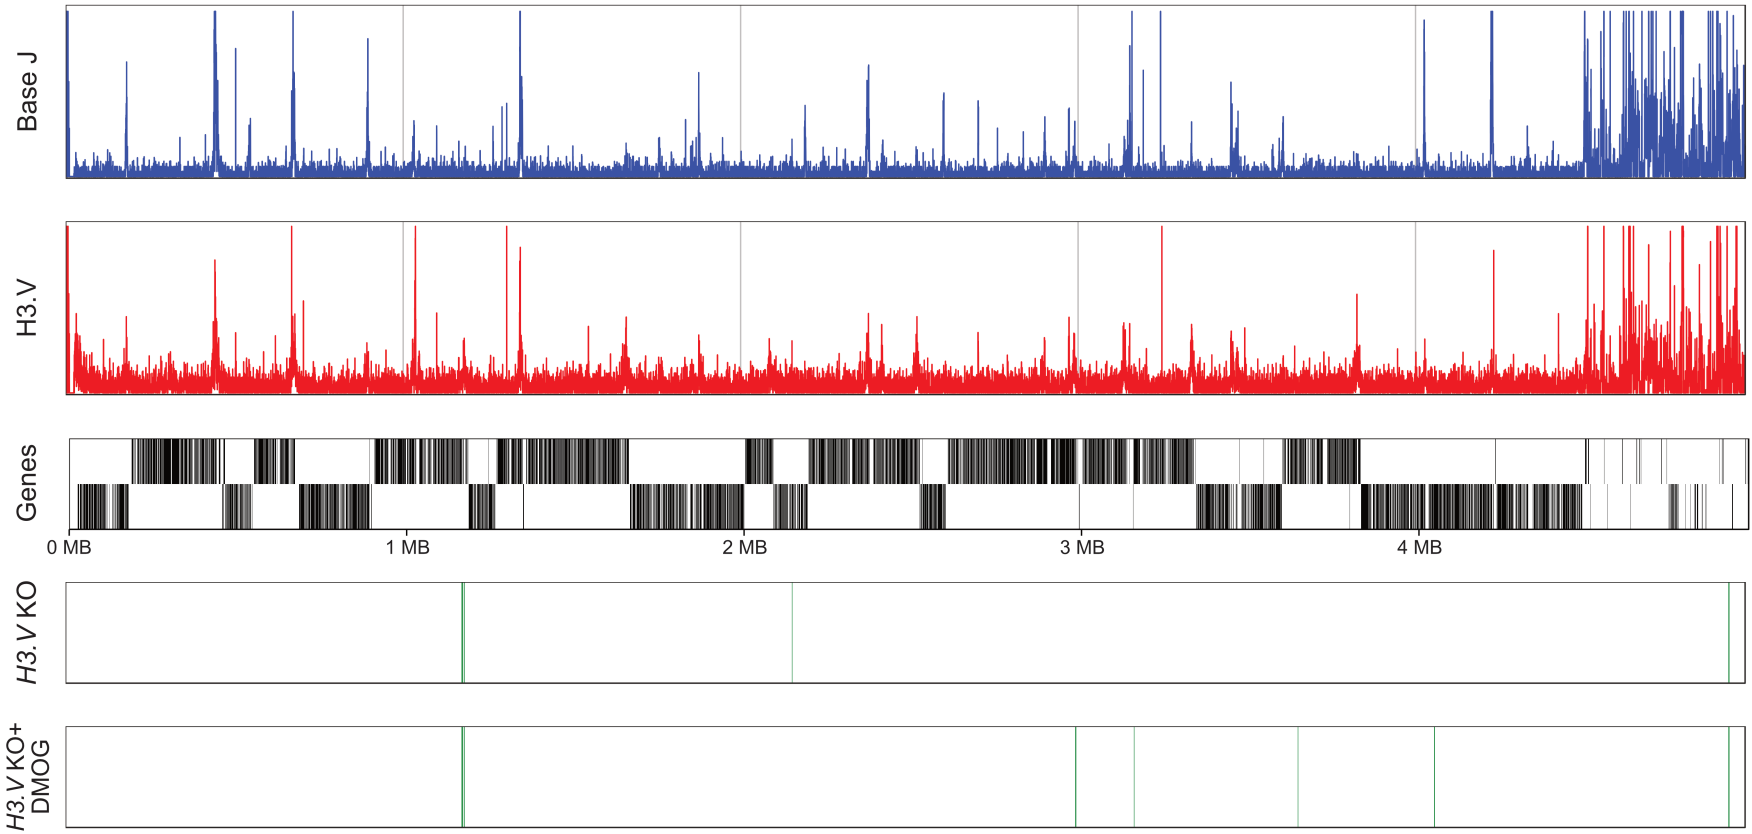

Supplement: pgen.1005758.s006.pdf [file pgen.1005758.s006.pdf]
